# Supplementary material for: Hydroxyapatite nanoparticles drive the potency of Toll-like receptor 9 agonist for amplified innate and adaptive immune response
Source: Springer Nature journal article supplement (doi:10.1007/s12274-022-4683-x), 2022-07-23
Supplement: MOESM1 [file 12274_2022_4683_MOESM1_ESM.pdf]

## Electronic Supplementary Material

### Hydroxyapatite nanoparticles drive the potency of Toll-like receptor 9 agonist for amplified innate and adaptive immune response

Qin Zeng<sup>1,2,3</sup> (✉), Ruiqi Wang<sup>4</sup>, Yuchen Hua<sup>1,3</sup>, Hongfeng Wu<sup>1,3</sup>, Xuening Chen<sup>1,3</sup>, You-cai Xiao<sup>4</sup>, Qiang Ao<sup>2,3</sup>, Xiangdong Zhu<sup>1,3</sup> (✉), and Xingdong Zhang<sup>1,2,3</sup>

<sup>1</sup> National Engineering Research Center for Biomaterials, Sichuan University, Chengdu 610064, China

<sup>2</sup> NMPA Key Laboratory for Quality Research and Control of Tissue Regenerative Biomaterials & Institute of Regulatory Science for Medical Devices & NMPA Research Base of Regulatory Science for Medical Devices, Sichuan University, Chengdu 610064, China

<sup>3</sup> College of Biomedical Engineering, Sichuan University, Chengdu 610064, China

<sup>4</sup> Key Laboratory of Drug-Targeting and Drug Delivery System of the Education Ministry and Sichuan Province, Sichuan University, Chengdu 610041, China

Supporting information to <https://doi.org/10.1007/s12274-022-4683-x>

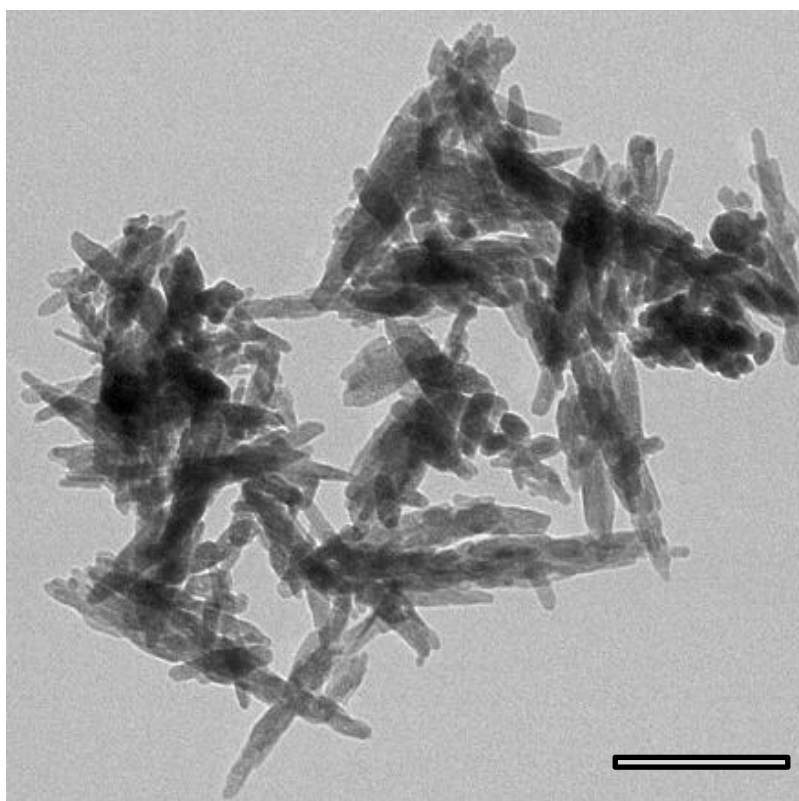

**Figure S1** The TEM (HT7800, HITACHI) image of HANPs after sterilization at 200 °C for 2 h. scan bar = 200 nm.

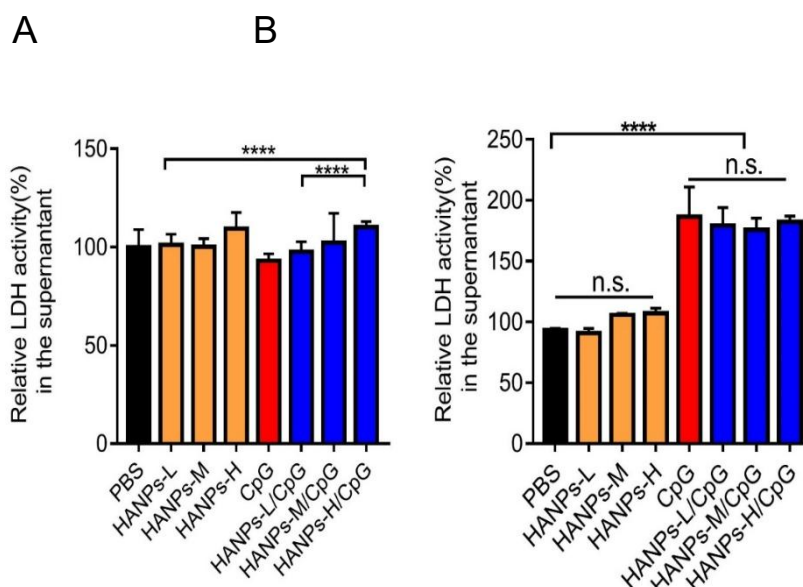

**Figure S2** Relative LDH activity in the cell culture supernatant after macrophages were treated with PBS, HANPs at varying concentrations (50, 250 and 1000  $\mu\text{g/mL}$ ), CpG alone (0.5  $\mu\text{g/mL}$ ) or HANPs and CpG co-stimulation for 24 h (A) or 72 h (B). One-way ANOVA with Tukey's multiple comparisons test was performed for statistical analysis with \*\* ( $p < 0.01$ ), \*\*\* ( $p < 0.001$ ), \*\*\*\* ( $p < 0.0001$ ). n.s. indicated no significance.

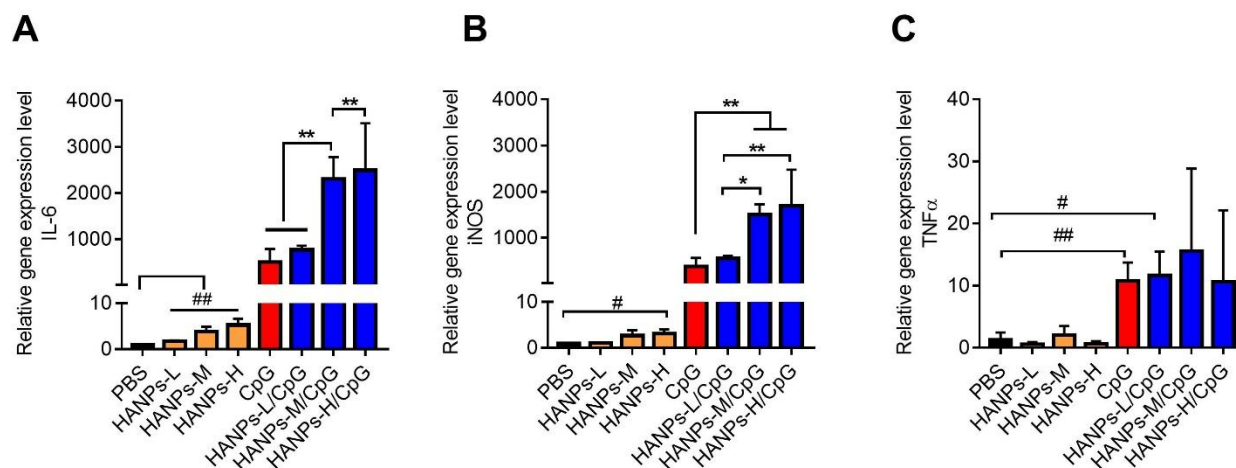

**Figure S3** qRT-PCR analysis for mRNA expressing TNF- $\alpha$  (A), IL-6 (B) and INOS (C) by macrophage after the cells were treated with PBS, CpG ODN alone (0.5  $\mu\text{g/mL}$ ), HANPs at varying concentration (50, 250, and 1000  $\mu\text{g/mL}$ ), or co-stimulators of CpG ODN and HANPs for 24 h. One-way ANOVA with Tukey's multiple comparisons test was performed for statistical analysis with \* ( $p < 0.05$ ), \*\* ( $p < 0.01$ ). Student's t-test was used to test compare two groups with # ( $p < 0.05$ ), ## ( $p < 0.01$ ).

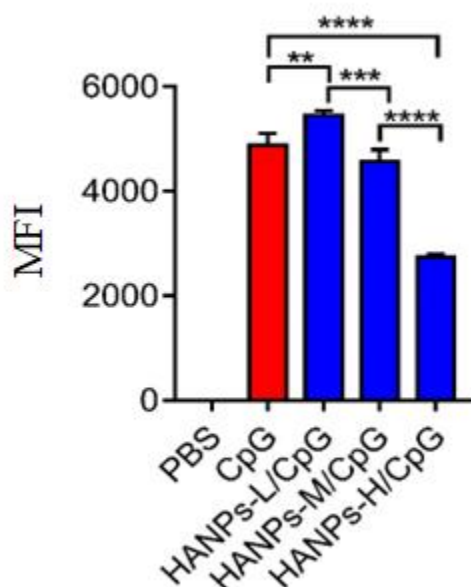

**Figure S4** Mean fluorescence intensity (MFI) of Cy5-CpG in macrophage following the cells received treatments of PBS, CpG (0.5  $\mu\text{g/mL}$ ) in the presence or absence of HANPs at varying concentrations (50, 250, 1000  $\mu\text{g/mL}$ ). One-way ANOVA with Tukey's multiple comparisons test was performed for statistical analysis with \*\* ( $p<0.01$ ), \*\*\* ( $p<0.001$ ), \*\*\*\* ( $p<0.0001$ ).

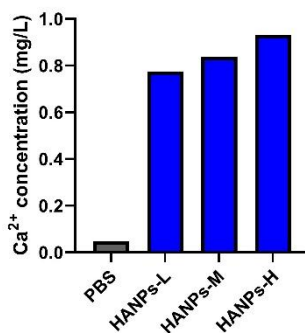

**Figure S5** The release of  $\text{Ca}^{2+}$  after HANPs with varying concentration were incubated in PBS (pH 7.4) for 24 hours.

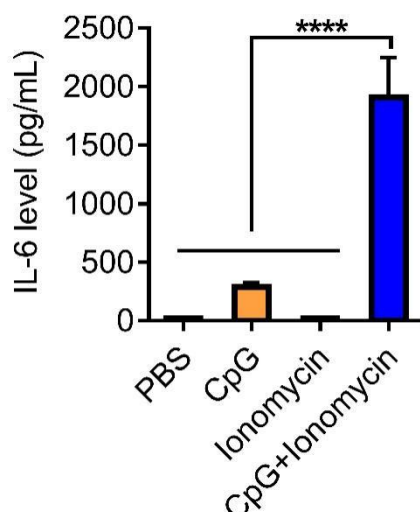

**Figure S6** The level of IL-6 secreted by RAW 264.7 exposed to PBS, CpG (0.5  $\mu\text{g/mL}$ ), Ionomycin (1  $\mu\text{M}$ ) and co-stimulation of CpG and Ionomycin for 48 h. One-way ANOVA with Tukey's multiple comparisons test was performed for statistical analysis with \*\*\*\* ( $p < 0.0001$ ).

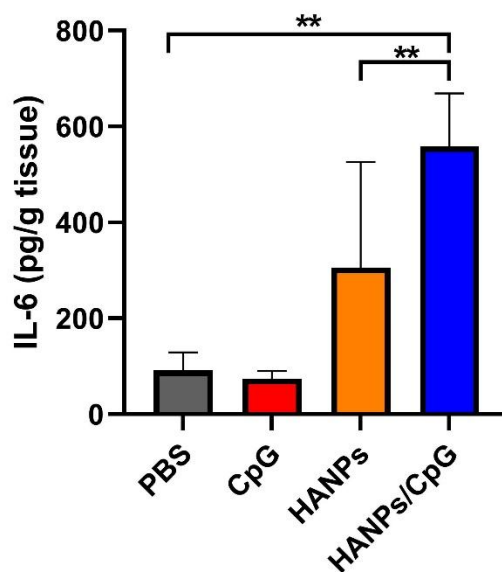

**Figure S7** The level of IL-6 in the injection tissue. C57BL/6 mice were injected subcutaneously with PBS, CpG (5  $\mu\text{g}$ ), HANPs (5 mg), or a mixture of HANPs and CpG. 7 days later, the injection site was excised and homogenized, and IL-6 was determined by ELISA.



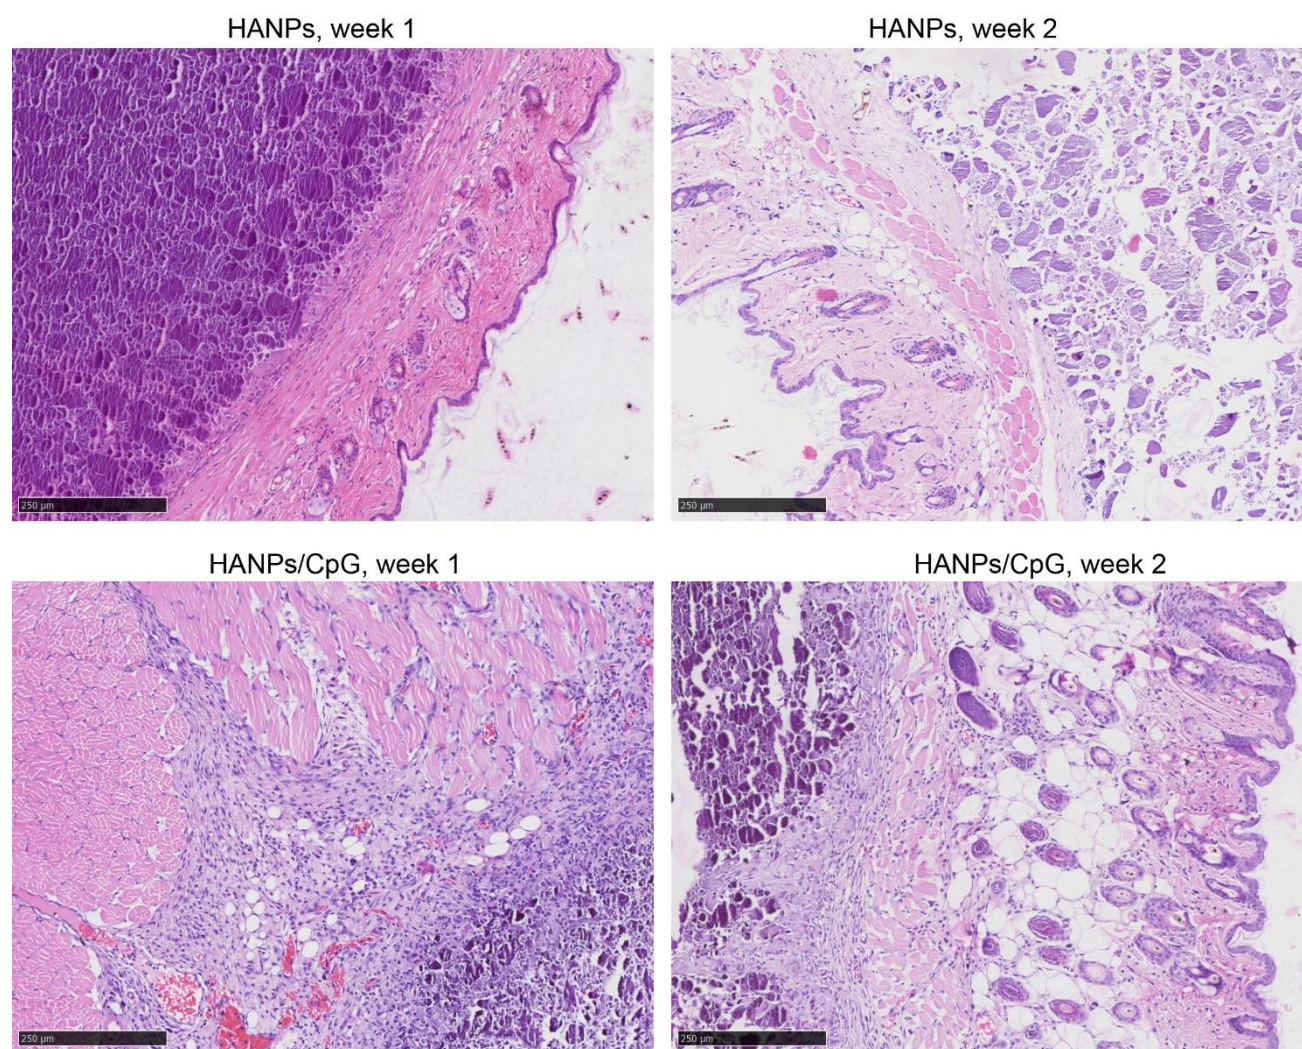

**Figure S8** H&E staining of the surrounding tissues together with the biomaterials after HANPs or HANPs/CpG were subcutaneously injected into the mice for 1 and 2 weeks. Scale bar = 250 μm.

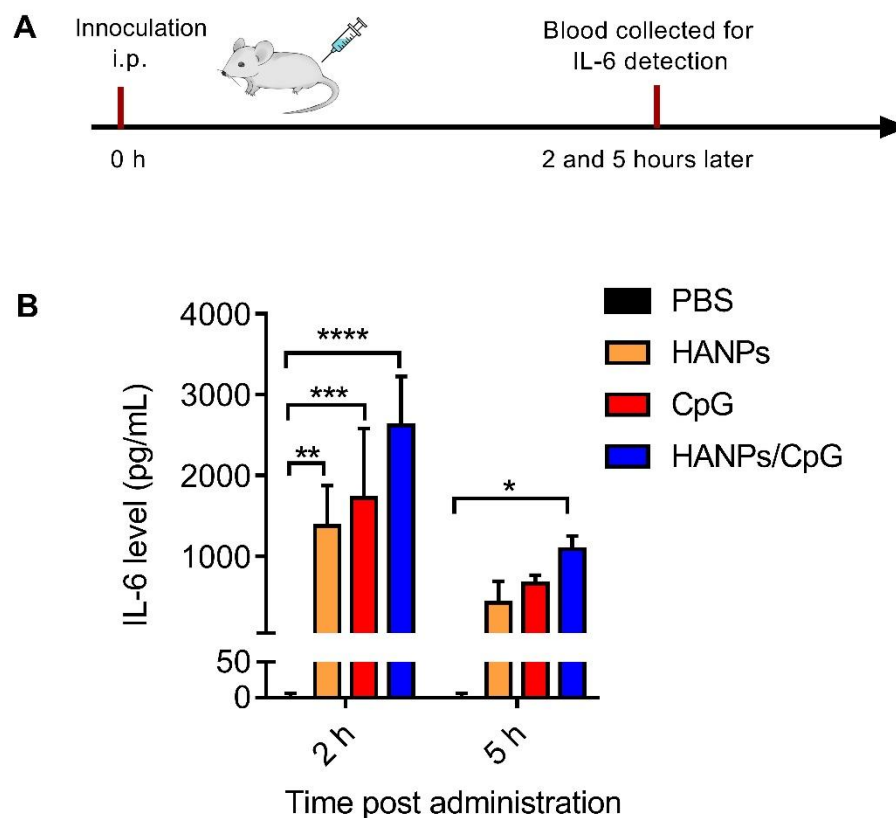

**Figure S9** The schematic of administration and serum collection. Serum IL-6 level of mice following intraperitoneal (i.p.) treatment with PBS, HANPs, CpG alone or HANPs and CpG co-stimulation for 2 and 5 h (B). One-way ANOVA with Tukey's multiple comparisons test was performed for statistical analysis with \*\* ( $p < 0.01$ ), \*\*\* ( $p < 0.001$ ), \*\*\*\* ( $p < 0.0001$ ).

**Table 1** qPCR primer sequences for mRNA encoding INOS, TNF $\alpha$  and IL-6

| Gene         | Primer sequences                   |
|--------------|------------------------------------|
| TNF $\alpha$ | F: 5'-TGGGAGTAGACAAGGTACAACCC-3'   |
|              | R: 5'-CATCTTCTCAAAATTCGAGTGACAA-3' |
| IL-6         | F: 5'-GAGGATACCACTCCCAACAGACC-3'   |
|              | R: 5'-AAGTGCATCATCGTTGTTCATACA-3'  |
| INOS         | F: 5'-GTGACGGCAAACATGACTT-3'       |
|              | R: 5'-TCGATGCACAACCTGGGT-3'        |
